# Supplementary material for: Shiga Toxin (Stx) Type 1a and Stx2a Translocate through a Three-Layer Intestinal Model
Source: MDPI journal article supplement (doi:10.3390/toxins15030207), 2023-03-09
Supplement: s1 [file s1]

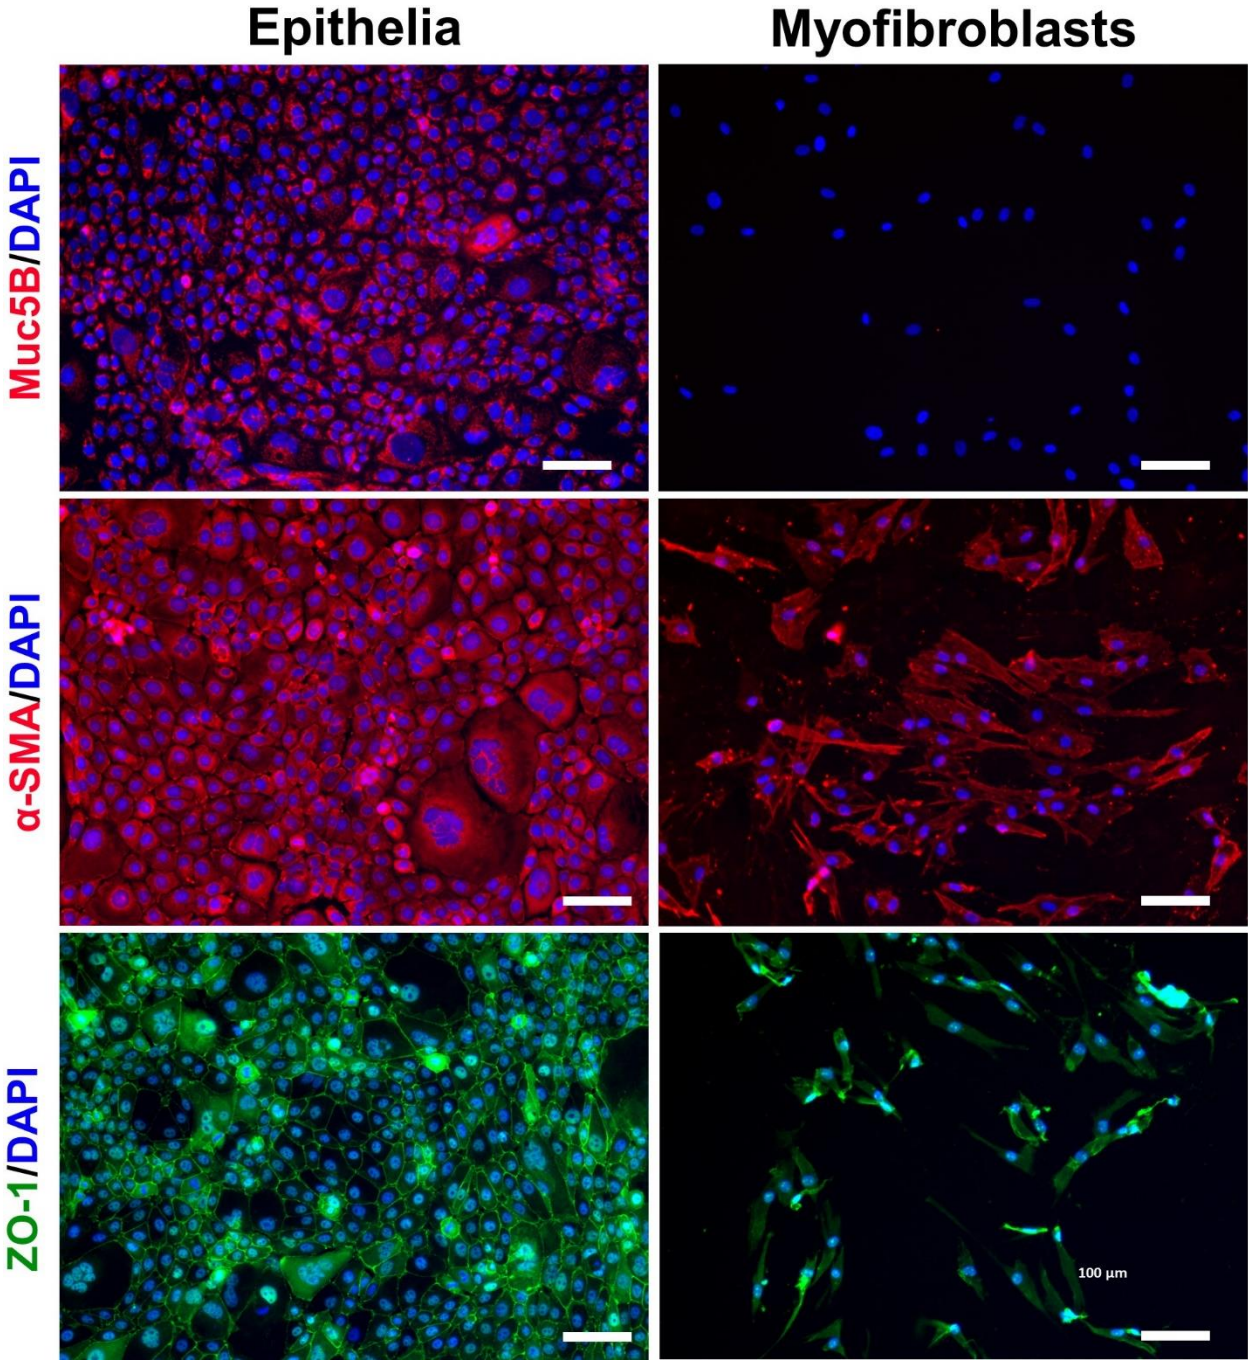

**Supplemental Figure S1.** Immunofluorescence images showing Muc5B expression (top row),  $\alpha$ SMA (middle row) or ZO-1 (bottom row) in monolayers of primary colonic epithelial cells and hMSC-derived myofibroblasts. The cell nuclei were counterstained with DAPI as a visual aid.

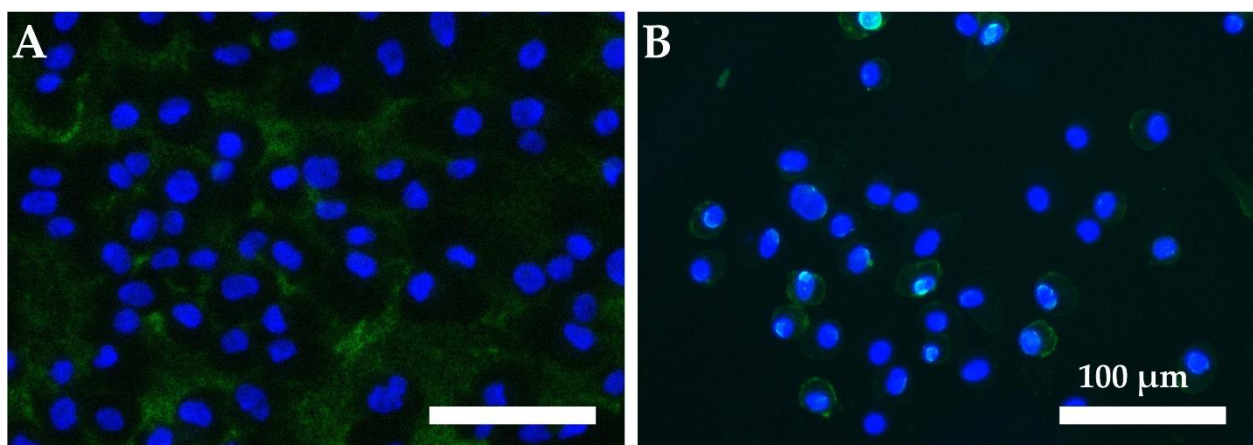

**Supplemental Figure S2.** Immunofluorescence images showing Gb3 expression (green) in monolayers of (A) primary colonic epithelial cells and (B) primary colonic microvascular endothelial cells. The cell nuclei were counterstained with DAPI as a visual aid.

**Supplementary Table S1:** Gene names and primer sequences for all genes evaluated with RT-qPCR

| Epithelial Genes |                                                 |                                  |                                  |
|------------------|-------------------------------------------------|----------------------------------|----------------------------------|
| Gene             | Official Name                                   | Forward Primer Sequence (5'--3') | Reverse Primer Sequence (5'--3') |
| ACTB             | Beta Actin                                      | CACCATTGGCAATGAGCGGTTTC          | AGGTCCTTTGCGGATGTCCACGT          |
| GB3              | Globotriaosylceramide                           | ACTTCATTGTTGATCTTGATG            | CGACGAATTCCCAGCTAAAC             |
| CDH1             | Cadherin 1                                      | GACCGGTGCAATCTTCAAA              | TTGACGCCGAGAGCTACAC              |
| CKB              | Creatine Kinase B                               | CCCACACCAGGAAGGTCTTA             | CCTCTTCGACAAGCCCGT               |
| FXD3             | FXD domain containing ion transport regulator 3 | AGGGTCACCTTCTGCATGTC             | CTTCGGATAAACGCAGGACT             |
| GATA4            | GATA binding protein 4                          | TAGCCCCACAGTTGACACAC             | GTCCTGCACAGCCTGCC                |
| HOXA13           | Homeobox A 13                                   | GCACCTTGGTATAAGGCACG             | CCTCTGGAAGTCCACTCTGC             |
| HOXB13           | Homeobox B 13                                   | GCTGTACGGAATGCGTTTCT             | AACCCACCAGGTCCCTTTT              |
| HOXD13           | Homeobox D 13                                   | CCTCTTCGGTAGACGCACAT             | CAGGTGTACTGCACCAAGGA             |
| INSL5            | Insulin like 5                                  | GAAGGTTTTCGCTGGATT               | GATCCCTCAAGCTCAGCAAG             |
| MSX2             | Msh Homeobox 2                                  | GGTCTTGTGTTTCTCAGGG              | AAATTCAGAAGATGGAGCGG             |
| MUC2             | Mucin 2                                         | TGTAGGCATCGCTCTTCTCA             | GACACCATCTACCTCACCCG             |
| ONECUT1          | One Cut Homeobox 1                              | TTTTTGGGTGTGTTGCCTCT             | AGACCTTCCGGAGGATGTG              |
| PDX1             | Pancreatic and Duodenal Homeobox 1              | CGTCCGCTTGTCTCCTC                | CCTTTCCCATGGATGAAGTC             |
| PPIA (CPHA)      | Peptidylprolyl Isomerase A                      | CCCACCGTGTCTTCGACATT             | GGACCCGTATGCTTTAGGATGA           |
| SATB2            | SATB Homeobox 2                                 | CCACCTTCCCAGCTTGATT              | TTAGCCAGCTGGTGGAGACT             |
| MUC5B            | Mucin 5b                                        | GCCTACGAGGACTTCAACGTC            | CCTTGATGACAACACGGGTGA            |
| NEUROG3          | Neurogenin 3                                    | CTAAGAGCGAGTTGGCACTGA            | GAGGTTGTGATTTCGATTGCG            |
| VIL1             | Villin 1                                        | CTGAGCGCCCAAGTCAAAG              | AGCAGTCACCATCGAAGAAGC            |
| CD326/EPCAM      | Epithelial Cell Adhesion Molecule               | TGATCCTGACTGCGATGAGAG            | CTTGTCTGTTCTTCTGACCCC            |

|                            |                                                 |                                         |                                         |
|----------------------------|-------------------------------------------------|-----------------------------------------|-----------------------------------------|
| E-Cadherin/CDH1            | Cadherin 1, E-cadherin                          | CGAGAGCTACACGTTACGG                     | GGGTGTCGAGGGAAAAATAGG                   |
| <b>Myofibroblast Genes</b> |                                                 |                                         |                                         |
| <b>Gene</b>                | <b>Official Name</b>                            | <b>Forward Primer Sequence (5'--3')</b> | <b>Reverse Primer Sequence (5'--3')</b> |
| ACTB                       | Beta Actin                                      | CACCATTGGCAATGAGCGGTC                   | AGGTCTTTGCGGATGTCCACGT                  |
| GB3                        | Globotriaosylceramide                           | ACTTCATTGTTGATCTTGCATG                  | CGACGAATTCCCAGCTAAAC                    |
| SM22/TAGLN                 | Spicule Matrix Protein 22, Transgelin           | CCGTGGAGATCCCAACTGG                     | CCATCTGAAGGCCAATGACAT                   |
| FN1                        | Fibronectin 1                                   | CGGTGGCTGTCAGTCAAAG                     | AAACCTCGGCTTCCTCCATAA                   |
| ELN                        | Elastin                                         | GCAGGAGTTAAGCCCAAGG                     | TGTAGGGCAGTCCATAGCCA                    |
| COL1A1                     | Collagen Type 1, $\alpha$ 1 chain               | GAGGGCCAAGACGAAGACATC                   | CAGATCACGTCATCGCACAAC                   |
| COL1A2                     | Collagen Type 1, $\alpha$ 2 chain               | GAGCGGTAACAAGGGTGAGC                    | CTTCCCCATTAGGGCCTCTC                    |
| alpha SMA (ACTA2)          | Actin $\alpha$ 2, smooth muscle                 | AAAAGACAGCTACGTGGTGA                    | GCCATGTTCTATCGGGTACTTC                  |
| <b>Endothelial Genes</b>   |                                                 |                                         |                                         |
| <b>Gene</b>                | <b>Official Name</b>                            | <b>Primer Sequence (5'--3')</b>         | <b>Reverse Primer Sequence (5'--3')</b> |
| ACTB                       | Beta Actin                                      | CACCATTGGCAATGAGCGGTC                   | AGGTCTTTGCGGATGTCCACGT                  |
| GB3                        | Globotriaosylceramide                           | ACTTCATTGTTGATCTTGCATG                  | CGACGAATTCCCAGCTAAAC                    |
| VE-Cadherin/CDH5           | Cadherin 5, VE-Cadherin                         | TTGGAACCAGATGCACATTGAT                  | TCTTGCGACTCACGCTTGAC                    |
| CD31/PECAM1                | Platelet and Endothelial Cell Adhesion Molecule | AACAGTGTTGACATGAAGAGCC                  | TGTAAAACAGCACGTCATCCTT                  |
| ZO-1/TJP1                  | Zonula Occludin 1                               | CAACATACAGTGACGCTTCACA                  | CACTATTGACGTTTCCCCACTC                  |
| Claudin 5/CLDN5            | Claudin 5                                       | CTCTGCTGGTTCCGCAACAT                    | CAGCTCGTACTTCTGCGACA                    |

**Supplementary Table S2: Immunofluorescence antibody sources and dilutions**

| <u>Primary Antibody</u>            | <u>Source</u>  | <u>Dilution</u> |
|------------------------------------|----------------|-----------------|
| Mucin 5b -- Mouse                  | Santa Cruz     | 1:100           |
| Anti- $\alpha$ -SMA -- Mouse       | Sigma          | 1:200           |
| Anti-ZO1 -- Rabbit                 | Invitrogen     | 1:50            |
| DAPI                               | Invitrogen     | 300 nM          |
| Anti-CD77 -- Mouse                 | BD Biosciences | 1:1000          |
| <u>Secondary Antibody</u>          | <u>Source</u>  | <u>Dilution</u> |
| Goat anti-mouse Alexa Fluor 488    | Invitrogen     | 1:500           |
| Goat anti-rabbit Alexa Fluor 488   | Invitrogen     | 1:500           |
| Donkey anti-rabbit Alexa Fluor 555 | Invitrogen     | 1:500           |

|                                   |            |       |
|-----------------------------------|------------|-------|
| Donkey anti-mouse Alexa Fluor 555 | Invitrogen | 1:500 |
|-----------------------------------|------------|-------|

21  
22  
23  
  
24
